# Supplementary material
Source: PubMed Central journal article supplement (PMC7854872)
Supplement: NIHMS1626645-supplement-Supplemental_Table_1__Criteria_for_Assessment_of_Study_Quality.pdf [file NIHMS1626645-supplement-Supplemental_Table_1__Criteria_for_Assessment_of_Study_Quality.pdf]

**Supplemental Table 1. Criteria for Assessment of Study Quality**

| Study Design                                                                   | Criteria                                                                                                                                                                                                                                                                                                                                                                                                                                                                                                                                                                                                                      |
|--------------------------------------------------------------------------------|-------------------------------------------------------------------------------------------------------------------------------------------------------------------------------------------------------------------------------------------------------------------------------------------------------------------------------------------------------------------------------------------------------------------------------------------------------------------------------------------------------------------------------------------------------------------------------------------------------------------------------|
| Non-randomized epidemiological studies (cohort, cross-sectional, case-control) | <ul style="list-style-type: none"><li>• Was the exposed population(s) representative of the general population?</li><li>• Was the non-exposed population selected from the same community as exposed population?</li><li>• How was “exposure” ascertained?</li><li>• Was it demonstrated that the outcome of interest was not present at the start of the study?</li><li>• Were the population(s) comparable on the basis of the design or analysis?</li><li>• Were outcome assessors blind?</li><li>• Was follow up long enough for outcomes to occur?</li><li>• Was there adequate of follow up of population(s)?</li></ul> |
